# Supplementary material for: Male Homosexual Preference: Femininity and the Older Brother Effect in Indonesia
Source: PubMed Central journal article supplement — Evol Psychol. 2019 Nov 19;17(4):1474704919880701. doi: 10.1177/1474704919880701 (PMC10358421; doi:10.1177/1474704919880701), 2019-11-19
Supplement: MHP_Indonesia_revised_supplementary.pdf [file MHP_Indonesia_revised_supplementary.pdf]

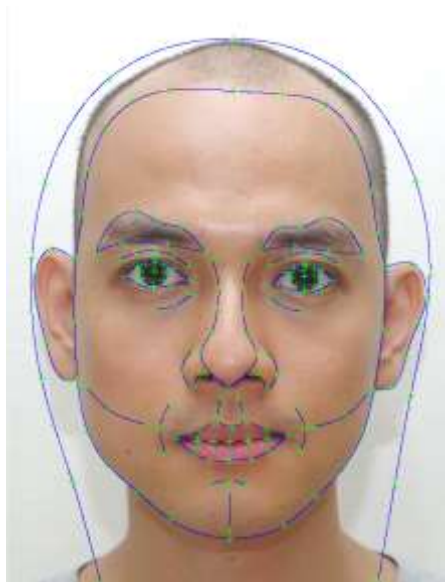

**SUPPLEMENTARY INFORMATIONS**

Figure S1 Example of the delineation of one of the male faces using Psychomorph  
Reproduced with permission

Table S1 Effect of each variable on the choice of the photographs considered most masculinized in M+ (for pairs M+/F+). Bold characters indicate significant ( $p < 0.05$ ) values

|                   | M+/F+      |         |         |                | ANOVA |      |              |
|-------------------|------------|---------|---------|----------------|-------|------|--------------|
|                   | $\beta$    | SE      | z-value | $p$ -value     | $X^2$ | $df$ | $p$ -value   |
| Intercept         | - 0.10281  | 0.06521 | - 1.577 | 0.114886       |       |      |              |
| Focal is M+       | 0.20841    | 0.22274 | 0.936   | 0.34943        | 9.27  | 1    | <b>0.002</b> |
| Interaction with: |            |         |         |                |       |      |              |
| Sex (F)           | - 0.25134  | 0.14554 | - 1.727 | 0.08417        | 2.98  | 1    | 0.084        |
| Age               | - 0.21544  | 0.08119 | - 2.654 | <b>0.00796</b> | 7.04  | 1    | <b>0.008</b> |
| Sex. orientation  | 0.40081    | 0.46451 | 0.863   | 0.38821        | 0.74  | 1    | 0.388        |
| Study             | - 0.17235  | 0.16369 | - 1.053 | 0.29239        | 1.11  | 1    | 0.292        |
| Salary            | 0.12384    | 0.08286 | 1.495   | 0.13503        | 2.23  | 1    | 0.135        |
| Ethnics           |            |         |         |                | 7.90  | 3    | <b>0.048</b> |
| Javanese          | 0.25678    | 0.17641 | 1.456   | 0.14550        |       |      |              |
| Sumatran          | - 0.162363 | 0.21649 | - 0.751 | 0.45253        |       |      |              |
| Others            | 0.47800    | 0.24973 | 1.914   | 0.05561        |       |      |              |
| Couple            | 0.11883    | 0.16801 | 0.707   | 0.479376       | 0.50  | 1    | 0.479        |

Table S2 Effect of each variable on the choice of the photo considered most masculinized in Hetero+ (for pairs Hetero+/Homo+). Bold characters indicate significant ( $p < 0.05$ ) values

|                   | Hetero+/Homo+ |          |         |               | ANOVA |    |               |
|-------------------|---------------|----------|---------|---------------|-------|----|---------------|
|                   | $\beta$       | SE       | z-value | $p$ -value    | $X^2$ | df | $p$ -value    |
| Intercept         | -0.1533       | 0.06985  | -2.194  | <b>0.0282</b> |       |    |               |
| Focal is Hetero+  | 0.05389       | 0.27749  | 0.237   | 0.8127        | 13.14 | 1  | <b>0.0003</b> |
| Interaction with: |               |          |         |               |       |    |               |
| Sex (F)           | -0.2013       | 0.1526   | -1.319  | 0.1871        | 1.74  | 1  | 0.187         |
| Age               | -0.1891       | 0.08543  | -0.221  | 0.8248        | 0.05  | 1  | 0.825         |
| Sex. orientation  | 0.3362        | 0.3977   | 0.845   | 0.3979        | 0.71  | 1  | 0.398         |
| Study             | -0.002797     | 0.1714   | 0.016   | 0.9870        | <0.01 | 1  | 0.987         |
| Salary            | 0.1062        | 0.08903  | 1.193   | 0.2329        | 1.42  | 1  | 0.233         |
| Ethnics           |               |          |         |               | 5.65  | 3  | 0.130         |
| Javanese          | 0.413819      | 0.184340 | 2.245   | <b>0.0248</b> |       |    |               |
| Sumatran          | 0.192575      | 0.217053 | 0.887   | 0.3750        |       |    |               |
| Others            | 0.413878      | 0.267003 | 1.550   | 0.1211        |       |    |               |
| Couple            | -0.018124     | 0.172754 | -0.105  | 0.9164        | 0.01  | 1  | 0.916         |

Table S3 Effect of each variable on the choice of the photo considered most masculinized in OB- (for pairs OB+/OB-). Bold characters indicate significant ( $p < 0.05$ ) values

|                   | OB+/OB-    |          |         |                | ANOVA |    |                          |
|-------------------|------------|----------|---------|----------------|-------|----|--------------------------|
|                   | $\beta$    | SE       | z-value | $p$ -value     | $X^2$ | df | $p$ -value               |
| Intercept         | - 0.246172 | 0.080679 | - 3.051 | <b>0.00228</b> |       |    |                          |
| Focal is OB-      | 0.569001   | 0.260778 | 2.182   | <b>0.02911</b> | 20.89 | 1  | < <b>10<sup>-5</sup></b> |
| Interaction with: |            |          |         |                |       |    |                          |
| Sex (F)           | - 0.159127 | 0.182386 | - 0.872 | 0.38295        | 0.76  | 1  | 0.383                    |
| Age               | - 0.118318 | 0.096718 | - 1.223 | 0.22121        | 1.50  | 1  | 0.221                    |
| Sex. orientation  | 0.446289   | 0.386246 | 1.155   | 0.24791        | 1.34  | 1  | 0.248                    |
| Study             | - 0.366234 | 0.206223 | - 1.776 | 0.07575        | 3.15  | 1  | 0.076                    |
| Salary            | 0.024484   | 0.104684 | 0.234   | 0.81507        | 0.05  | 1  | 0.815                    |
| Ethnics           |            |          |         |                | 4.36  | 3  | 0.226                    |
| Javanese          | - 0.216785 | 0.219871 | - 0.986 | 0.32415        |       |    |                          |
| Sumatran          | 0.334895   | 0.267611 | 1.251   | 0.21078        |       |    |                          |
| Others            | 0.007456   | 0.292101 | 0.026   | 0.97964        |       |    |                          |
| Couple            | 0.173784   | 0.199696 | 0.870   | 0.38417        | 3.76  | 1  | 0.384                    |
